# Supplementary material
Source: publisher site journal article supplement (https://www.spandidos-publications.com/5080/downloadSupplementary)

Figure S1. ROC curves showing the association of (A) the baseline NLR and (B) PLR with the metastatic stage at diagnosis of small bowel adenocarcinoma. ROC, receiver operating characteristic; AUC, area under the ROC curve; NLR, neutrophil-lymphocyte ratio; PLR, platelet-lymphocyte ratio.

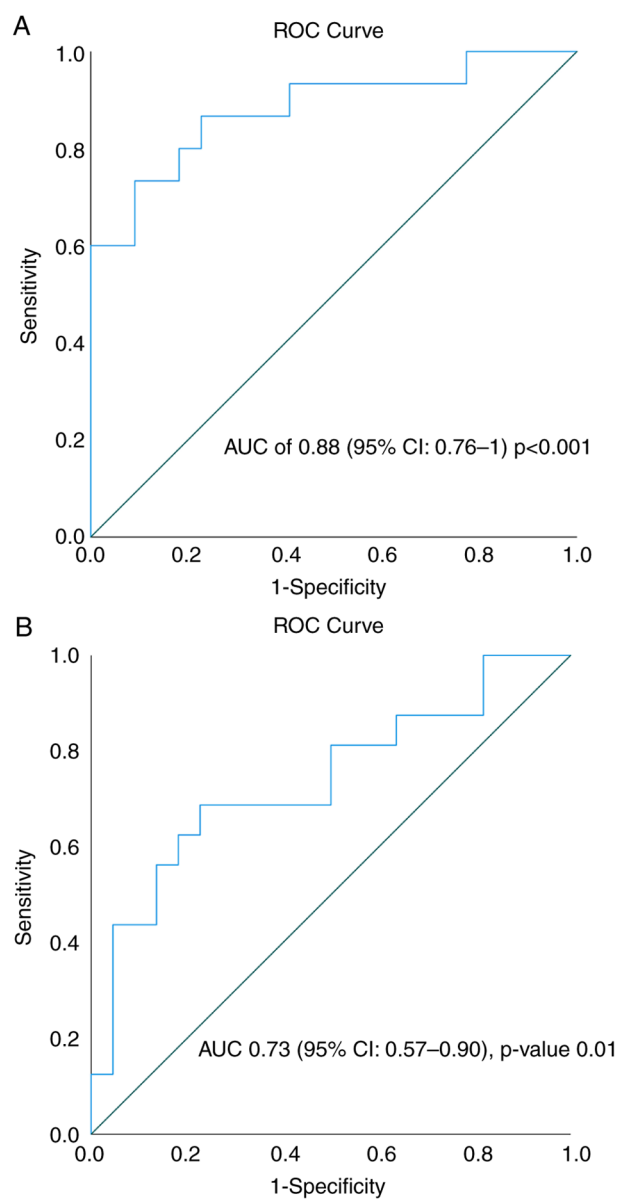

Supplement: Supplementary file 1 [file downloadSupplementary]
